# Supplementary material for: Exosome-Mediated Paracrine Signaling Unveils miR-1246 as a Driver of Aggressiveness in Fusion-Negative Rhabdomyosarcoma
Source: MDPI journal article supplement (doi:10.3390/cancers16091652), 2024-04-25

CD81 – Positive marker for exosomes

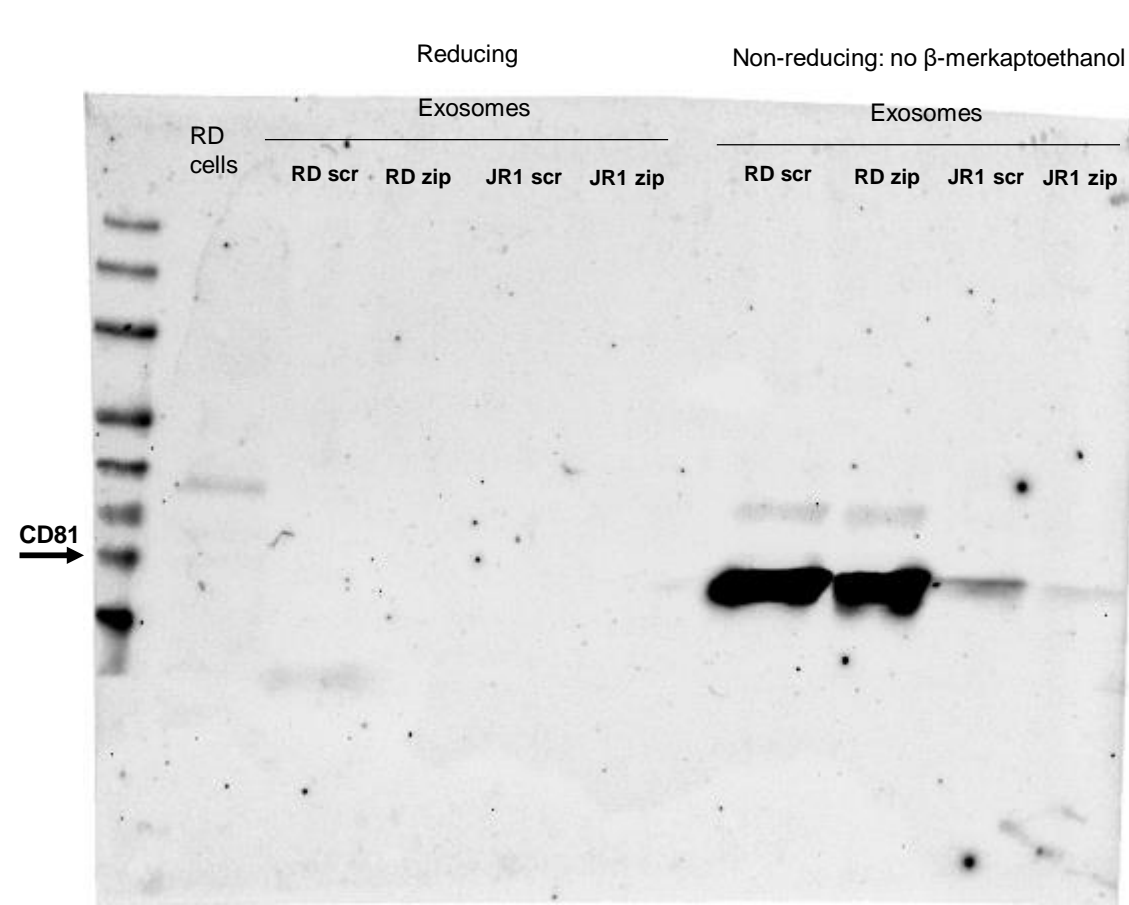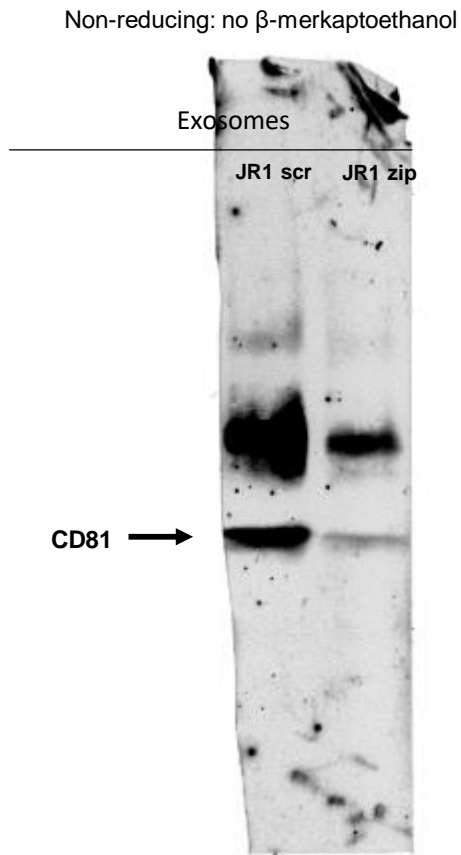

The membrane was cut to view JR1 scr and JR1 zip exosomes at higher exposure

CD63 – Positive marker for exosomes

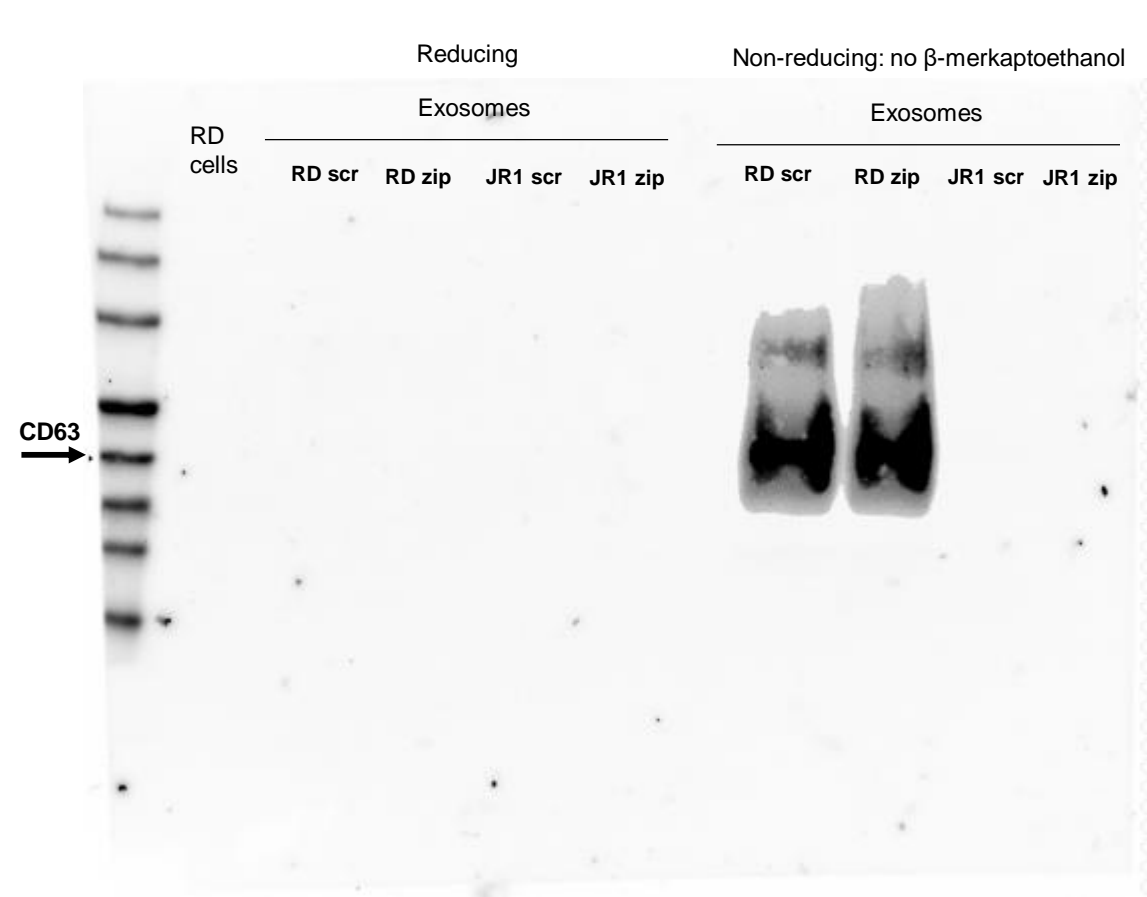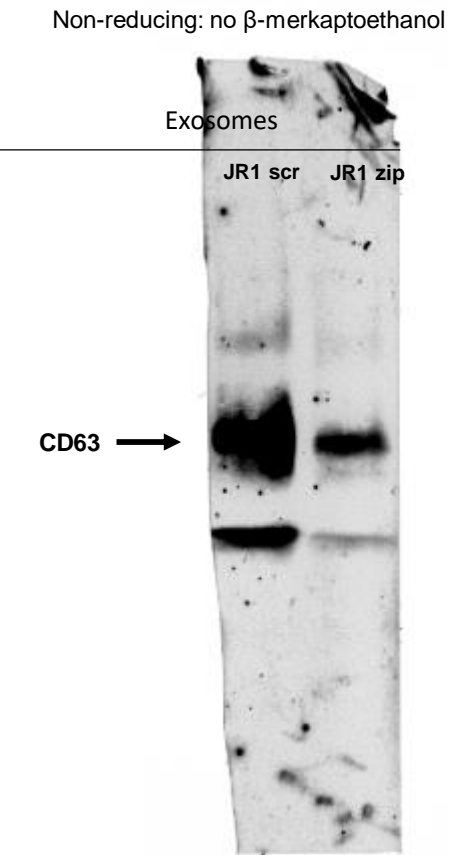

The membrane was cut to view JR1 scr and JR1 zip exosomes at higher exposure

Syntenin-1 – Positive marker for exosomes

Reducing conditions

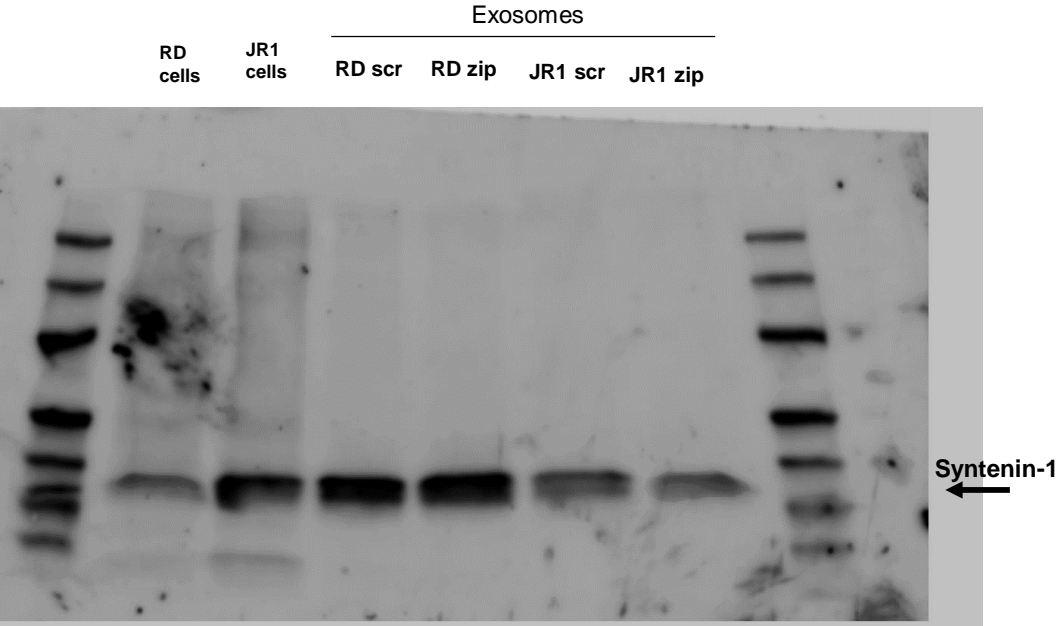

Calnexin – Negative marker for exosomes

Reducing conditions

| RD<br>cells | JR1<br>cells | Exosomes |        |         |         |
|-------------|--------------|----------|--------|---------|---------|
|             |              | RD scr   | RD zip | JR1 scr | JR1 zip |

Calnexin  
→

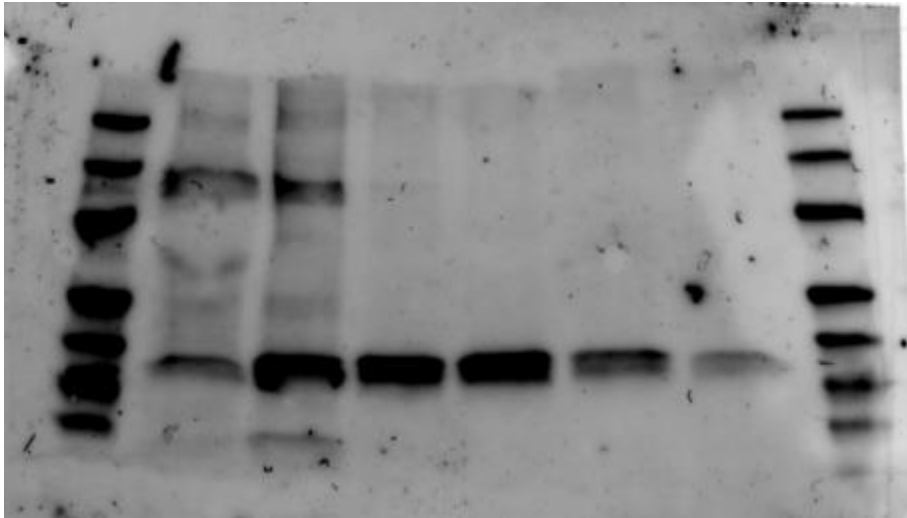

Supplement: s1 [file s1]
